# Supplementary material
Source: publisher figshare collection journal article supplement (https://acs.figshare.com/ndownloader/files/3968101)
Supplement: Supplementary file 1 [file 3968101]

## Sheet: Sheet1_molecular descriptor
NP isomers	steric	nclass	nX2	nXp3	nXp4	nXp5	nXp6	nXp7	nXp8	nXp9	nXp10	X1	X2	Xp3	Xp4	Xp5	Xp6	Xp7	Xp8	Xp9	Xp10	nXpc4	Xc3	Xc4	Xpc4	knotp	knotpv	sumdelI	tets1	htets1	htets2	diam	muldiam	rad	mulrad	W	Tg3	IDC	IDWbar	Si	SHBa	SwHBa	Hmin	Gmin	SHCsats	SsssCH	SaasC	minSHaaCH	minSsCH3
9	1.44321	13	21	23	24	27	26	19	12	10	8	7.55968	6.75604	4.7957	3.25307	2.34741	1.62387	0.798922	0.307125	0.181086	0.100592	16	1.48349	0.204124	2.52738	-0.927303	-0.875144	5.59283	47.4845	37.2691	9.70378	11	2	6	2	497	0	376.985	6.66009	72.2072	9.26844	9.30893	0.347804	0.223652	3.7531	0	1.6735	1.2111	2.2412
35	1.47733	13	22	26	26	29	27	20	12	8	6	7.4804	6.82144	5.32886	3.28878	2.42138	1.57728	0.685571	0.257213	0.116154	0.075087	23	1.54782	0.166667	3.59631	-1.00726	-0.95496	6.07464	45.6144	38.6497	10.1625	10	2	5	1	457	2	356.344	6.68843	73.8926	9.30243	9.3034	0.360771	0.183403	3.8866	0.6639	1.6617	1.2166	2.2364
36	1.45592	13	22	24	27	28	27	18	14	10	6	7.45353	7.04335	4.77706	3.70119	2.23888	1.63583	0.600159	0.325254	0.150175	0.075087	18	1.77216	0.204124	2.777	-1.25504	-1.19579	6.07176	46.2044	38.2459	10.0118	10	2	5	1	464	0	359.1	6.68588	73.3472	9.28852	9.29159	0.363216	0.196713	3.8583	0.7582	1.6615	1.2142	2.2401
37	1.44829	13	22	24	24	29	27	18	12	12	8	7.45353	6.99747	5.09943	3.06821	2.47071	1.65112	0.641556	0.264859	0.198287	0.099144	18	1.77216	0.204124	3.02018	-1.01185	-0.959695	6.03742	46.5071	37.9129	9.9057	10	2	5	1	473	1	363.407	6.67926	73.0053	9.27859	9.28568	0.367716	0.205486	3.8323	0.8022	1.6621	1.2127	2.2482
38	1.44492	12	22	23	24	27	28	18	12	10	10	7.41552	7.23145	4.72362	3.2116	2.22725	1.81505	0.652369	0.294131	0.155581	0.133164	17	1.89174	0.204124	2.81606	-1.04688	-0.994718	5.96706	46.5859	37.5999	9.81102	10	3	5	1	484	0	368.607	6.67011	72.6449	9.27125	9.28228	0.377438	0.210903	3.8013	0.7876	1.6628	1.2117	2.2714
65	1.47733	14	21	25	26	29	28	21	12	8	6	7.62034	6.42148	5.16058	3.40542	2.45094	1.71614	0.866173	0.31502	0.142259	0.091963	19	1.2356	0.144338	2.76395	-0.837186	-0.748395	5.77777	48.782	38.741	10.1156	10	2	5	1	465	1	358.713	6.68933	73.2523	9.30923	9.41803	0.358341	0.266736	3.8315	0	1.708	1.2166	2.2399
110	1.50974	14	22	28	29	30	27	22	12	6	2	7.54106	6.50589	5.55775	3.7218	2.43925	1.48533	0.803422	0.271304	0.106189	0.024056	26	1.3299	0.117851	3.60406	-0.992139	-0.904376	6.25429	46.9679	39.9835	10.5485	9	2	5	2	432	2	338.821	6.71398	74.8806	9.33708	9.40175	0.3784	0.225903	3.9599	0.6732	1.6936	1.2215	2.2395
110	1.50974	14	22	28	29	30	27	22	12	6	2	7.54106	6.50589	5.55775	3.7218	2.43925	1.48533	0.803422	0.271304	0.106189	0.024056	26	1.3299	0.117851	3.60406	-0.992139	-0.904376	6.25429	46.9679	39.9835	10.5485	9	2	5	2	432	2	338.821	6.71398	74.8806	9.33708	9.40175	0.3784	0.225903	3.9599	0.6732	1.6936	1.2215	2.2395
111	1.48832	14	22	26	28	31	27	20	14	8	2	7.51419	6.68192	5.32083	3.49707	2.60521	1.54388	0.71801	0.339346	0.14021	0.024056	21	1.52427	0.144338	3.11931	-1.05918	-0.964329	6.22142	47.4891	39.5197	10.3747	9	2	5	2	441	2	343.468	6.70917	74.235	9.32316	9.38994	0.3829	0.239213	3.9219	0.7488	1.6934	1.219	2.2453
111	1.48832	14	22	26	28	31	27	20	14	8	2	7.51419	6.68192	5.32083	3.49707	2.60521	1.54388	0.71801	0.339346	0.14021	0.024056	21	1.52427	0.144338	3.11931	-1.05918	-0.964329	6.22142	47.4891	39.5197	10.3747	9	2	5	2	441	2	343.468	6.70917	74.235	9.32316	9.38994	0.3829	0.239213	3.9219	0.7488	1.6934	1.219	2.2453
112	1.4807	13	22	25	26	31	28	20	12	10	4	7.47618	6.8969	5.10193	3.24499	2.65043	1.66123	0.759407	0.278951	0.188323	0.048113	20	1.64385	0.144338	3.05262	-0.95676	-0.867968	6.14651	47.6855	39.126	10.2443	9	3	5	2	452	1	349.554	6.70023	73.7516	9.31323	9.38403	0.392623	0.247986	3.884	0.7528	1.694	1.2176	2.2432
119	1.48832	13	22	27	29	30	26	20	14	8	2	7.5184	6.67201	5.25019	3.78812	2.54613	1.43842	0.646574	0.314441	0.14021	0.024056	24	1.48803	0.166667	3.3621	-1.14667	-1.07666	6.16385	46.2906	39.3033	10.3628	9	2	5	2	437	0	342.123	6.70989	74.5522	9.32157	9.34813	0.379874	0.192917	3.9436	0.7102	1.6747	1.219	2.2456
128	1.45929	11	22	25	27	30	26	18	14	12	4	7.49153	6.83202	5.0905	3.52959	2.56898	1.49063	0.604638	0.294512	0.212379	0.048113	19	1.68761	0.204124	2.93885	-1.12821	-1.06896	6.09787	46.555	38.56	10.1061	9	3	5	2	453	0	351.23	6.69732	73.6863	9.29663	9.30825	0.386819	0.198796	3.8894	0.7952	1.666	1.2151	2.2649
143	1.50974	13	22	27	28	31	28	22	12	6	2	7.50305	6.72087	5.33642	3.44143	2.608	1.62628	0.822151	0.29741	0.130055	0.029463	25	1.41445	0.117851	3.64191	-1.00382	-0.921131	6.18373	47.0208	40.031	10.5304	9	2	5	2	436	2	340.226	6.71305	74.5758	9.33708	9.40175	0.374482	0.225903	3.9382	0.6144	1.6936	1.2215	2.2337
152	1.48832	14	21	25	28	31	28	21	14	8	2	7.62034	6.46438	4.92401	3.64198	2.67695	1.67107	0.818411	0.38511	0.171722	0.029463	19	1.2356	0.144338	2.58866	-1.01247	-0.910006	5.85597	49.1887	39.4402	10.2975	9	2	5	2	449	0	346.043	6.70882	73.6656	9.32837	9.46276	0.373525	0.27625	3.8669	0	1.721	1.219	2.2393
193	1.51736	14	22	28	30	31	27	22	14	4	0	7.54106	6.52191	5.47531	3.77743	2.54907	1.51182	0.764425	0.382213	0.075687	0	26	1.3299	0.117851	3.50976	-1.08644	-0.986046	6.2874	47.2957	40.4276	10.6605	8	3	4	1	425	2	331.365	6.72402	75.0711	9.3481	9.42981	0.399128	0.233333	3.9762	0.6639	1.7021	1.223	2.2371
193	1.51736	14	22	28	30	31	27	22	14	4	0	7.54106	6.52191	5.47531	3.77743	2.54907	1.51182	0.764425	0.382213	0.075687	0	26	1.3299	0.117851	3.50976	-1.08644	-0.986046	6.2874	47.2957	40.4276	10.6605	8	3	4	1	425	2	331.365	6.72402	75.0711	9.3481	9.42981	0.399128	0.233333	3.9762	0.6639	1.7021	1.223	2.2371
194	1.49595	13	22	25	30	31	28	20	16	6	0	7.47618	6.9588	4.69713	3.9336	2.52842	1.67243	0.679013	0.450254	0.109708	0	20	1.64385	0.144338	2.71513	-1.29425	-1.18573	6.21397	47.7175	39.9047	10.4623	8	4	4	1	436	0	336.547	6.71806	74.284	9.33419	9.41801	0.397654	0.246644	3.9262	0.6994	1.7018	1.2205	2.2351
R square with half lives	0.701491	0.120166	0.0870468	0.543603	0.809137	0.729908	0.00831993	0.420506	0.317668	0.479143	0.865974	0.0757083	0.249616	0.220283	0.553226	0.441036	0.260706	0.0422653	0.305955	0.267954	0.849925	0.461556	0.228914	0.525742	0.191467	0.127056	0.0456346	0.472635	0.0619212	0.813744	0.792349	0.835078	0.0765265	0.416158	0.0652162	0.81169	0.114903	0.866286	0.877925	0.717693	0.796129	0.555426	0.566461	0.109423	0.724464	0.0400806	0.405212	0.774167	0.105854
[truncated: 8 more columns]

## Sheet: Sheet2_PLS results
Proportion of Variance Explained
Latent Factors	Statistics
	X Variance	Cumulative X Variance	Y Variance	Cumulative Y Variance (R-square)	Adjusted R-square
1	0.512269	0.512269	0.815887	0.815887	0.797476
2	0.175358	0.687627	0.0733595	0.889247	0.864635
3	0.135495	0.823122	0.0293888	0.918635	0.888124
4	0.0933428	0.916465	0.0113808	0.930016	0.890025
Parameters			Variable Importance in the Projection						Weights						Loadings
Independent Variables	Dependent Variables		Variables	Latent Factors					Variables	Latent Factors					Variables	Latent Factors
	half_life			1	2	3	4			1	2	3	4			1	2	3	4
(Constant)	-366.385		steric	1.27184	1.22417	1.20478	1.19752		steric	0.168459	-0.0554864	-0.021281	0.0217302		steric	0.181004	-0.0874405	-0.00586838	-0.00213352
steric	3.63464		nclass	0.45464	0.690012	0.706251	0.716411		nclass	0.0602185	-0.246823	-0.144176	-0.17168		nclass	0.0996703	-0.254458	0.047035	-0.153001
nclass	-0.141118		nX2	0.59479	0.577723	0.632128	0.628974		nX2	0.0787818	0.04417	-0.20482	0.0361612		nX2	0.0738471	0.163774	-0.30034	0.122699
nX2	0.0494193		nXp3	1.12579	1.09119	1.07523	1.07286		nXp3	0.149115	-0.0769418	-0.0439593	0.113922		nXp3	0.164506	-0.0999648	-0.0684788	0.163382
nXp3	0.0461432		nXp4	1.40319	1.35051	1.32883	1.3216		nXp4	0.185857	0.0607637	-0.0121081	-0.0589977		nXp4	0.180907	0.0589814	-0.0202411	-0.0169631
nXp4	0.0663784		nXp5	1.43506	1.41869	1.42292	1.41528		nXp5	0.190078	0.161858	0.204684	0.0667442		nXp5	0.169655	0.0684453	0.13036	0.0215986
nXp5	0.179119		nXp6	0.0991423	0.131848	0.131067	0.143663		nXp6	0.0131317	-0.0421786	-0.0138705	-0.0725437		nXp6	0.0199409	-0.0500854	0.043311	-0.340161
nXp6	-0.0348801		nXp7	0.881372	0.906762	0.892146	0.887642		nXp7	0.116741	-0.15259	-0.00233173	0.0497296		nXp7	0.143017	-0.219254	0.0593767	-0.0152619
nXp7	0.0187503		nXp8	0.881995	1.01871	1.0075	1.02118		nXp8	0.116823	0.262502	0.0758265	-0.240017		nXp8	0.0791572	0.287135	0.0657427	-0.163952
nXp8	0.120027		nXp9	0.967656	0.983222	0.992971	0.994026		nXp9	-0.128169	0.151279	0.165908	0.14249		nXp9	-0.154515	0.125624	0.0496247	0.146156
nXp9	0.0222967		nXp10	1.43905	1.39618	1.37876	1.37046		nXp10	-0.190606	-0.102394	-0.0877411	0.0247242		nXp10	-0.179356	-0.05636	-0.0638582	0.000151679
nXp10	-0.0608222		X1	0.236624	0.285017	0.387086	0.384825		X1	0.0313416	-0.0796911	0.197599	0.0112452		X1	0.0443617	-0.223768	0.287733	-0.00224186
X1	0.784609		X2	0.627581	0.646954	0.657345	0.654913		X2	-0.0831251	0.110276	-0.121555	-0.0548079		X2	-0.102086	0.228819	-0.187937	-0.0924592
X2	-0.230878		Xp3	0.746189	0.785579	0.777466	0.781486		Xp3	0.0988351	-0.150332	-0.0622345	0.139962		Xp3	0.124339	-0.179202	-0.0624995	0.249382
Xp3	0.0630096		Xp4	1.22194	1.18004	1.16391	1.16262		Xp4	0.161851	0.0692256	-0.0607704	-0.139537		Xp4	0.155027	0.101775	-0.0455198	-0.0791184
Xp4	0.416194		Xp5	1.17194	1.23761	1.33224	1.333		Xp5	0.155227	0.240298	0.400293	0.184568		Xp5	0.121893	0.0659753	0.271359	0.0979032
Xp5	2.556		Xp6	0.820939	0.788447	0.776676	0.77927		Xp6	-0.108736	-0.0265079	-0.028348	-0.127944		Xp6	-0.107233	-0.00221616	0.0441025	-0.321412
Xp6	-1.0575		Xp7	0.0324476	0.465787	0.461027	0.45823		Xp7	0.00429779	-0.214321	0.0372442	-0.00652227		Xp7	0.0374156	-0.306554	0.17269	-0.0707831
Xp7	-0.818169		Xp8	0.704967	0.765399	0.758902	0.791513		Xp8	0.0933752	0.166179	0.0696217	-0.287384		Xp8	0.0699915	0.166404	0.136978	-0.34536
Xp8	1.68519		Xp9	0.72408	0.864012	0.988544	1.01396		Xp9	-0.0959068	0.237606	0.373646	0.300181		Xp9	-0.134786	0.116344	0.181228	0.164559
Xp9	5.32562		Xp10	1.43477	1.3992	1.38365	1.37531		Xp10	-0.19004	-0.121166	-0.10302	-0.0245201		Xp10	-0.175884	-0.0726259	-0.0474538	-0.0251866
Xp10	-5.05455		nXpc4	1.06626	1.04002	1.02853	1.02907		nXpc4	0.141229	-0.0905342	-0.0770476	0.141934		nXpc4	0.158527	-0.0978541	-0.116303	0.154367
nXpc4	0.0192362		Xc3	0.562572	0.599856	0.613961	0.611586		Xc3	-0.0745145	0.121529	-0.125306	-0.0493976		Xc3	-0.0950041	0.244581	-0.20181	-0.0181532
Xc3	-0.225897		Xc4	1.04714	1.04377	1.02986	1.02435		Xc4	-0.138698	0.133183	0.057406	0.0485846		Xc4	-0.162506	0.165337	-0.0287485	0.0479031
Xc4	-0.430311		Xpc4	0.798764	0.807067	0.813381	0.823945		Xpc4	0.105799	-0.118444	-0.130528	0.190798		Xpc4	0.126556	-0.0988359	-0.192008	0.237757
Xpc4	0.0752642		knotp	0.558381	0.707792	0.700861	0.703481		knotp	-0.0739593	-0.213779	0.0586062	0.117871		knotp	-0.0427821	-0.30601	0.136483	0.107775
knotp	-0.737429		knotpv	0.373612	0.583904	0.580736	0.582004		knotpv	-0.0494862	-0.212768	0.0629126	0.0896112		knotpv	-0.0178839	-0.310902	0.155544	0.0770342
knotpv	-0.636252		sumdelI	1.11674	1.0721	1.06943	1.06353		sumdelI	0.147916	0.0331871	-0.130462	0.0452341		sumdelI	0.146314	0.0959701	-0.205385	0.0891583
sumdelI	0.401868		tets1	0.181539	0.174216	0.354322	0.35638		tets1	0.0240454	0.00491565	0.229641	-0.0655706		tets1	0.0238588	-0.12865	0.318181	-0.215082
tets1	0.0745988		htets1	1.38805	1.32979	1.30854	1.30065		htets1	0.183852	0.0112879	0.0169624	0.0230103		htets1	0.186476	-0.0230456	0.00321194	-0.010877
htets1	0.141409		htets2	1.37306	1.3152	1.29403	1.28634		htets2	0.181866	-0.000164009	-0.00766193	0.0303655		htets2	0.186207	-0.0238474	-0.0248152	0.0203476
htets2	0.430487		diam	1.45165	1.44297	1.42957	1.4233		diam	-0.192276	-0.177847	-0.124177	-0.101026		diam	-0.169442	-0.135427	-0.00298081	0.0183225
diam	-0.302813		muldiam	0.421895	0.556279	0.548496	0.564813		muldiam	0.0558813	0.176288	-0.0267129	-0.176976		muldiam	0.0300505	0.240756	-0.0452427	-0.170458
muldiam	0.0956722		rad	1.06523	1.03225	1.02563	1.03295		rad	-0.141093	-0.0720921	0.105953	0.200114		rad	-0.133336	-0.134646	0.0732905	0.205359
rad	-0.103724		mulrad	0.310978	0.44899	0.719697	0.859279		mulrad	0.04119	0.154925	0.420751	0.570138		mulrad	0.0183016	-0.0415265	0.151594	0.379902
mulrad	0.649079		W	1.40855	1.35352	1.33183	1.32423		W	-0.186566	-0.0498456	-0.0144349	-0.0465823		W	-0.183315	-0.0291791	0.0339104	-0.0597525
W	-0.00732035		Tg3	0.564083	0.755588	0.797472	0.793384		Tg3	0.0747146	-0.243572	-0.213747	-0.0428038		Tg3	0.11401	-0.212544	-0.107006	0.0786909
Tg3	-0.120713		IDC	1.45107	1.39948	1.37837	1.37088		IDC	-0.192199	-0.0752717	-0.0468281	-0.0618082		IDC	-0.185165	-0.043526	0.0155211	-0.0263444
IDC	-0.0136827		IDWbar	1.45907	1.4091	1.38983	1.38212		IDWbar	0.193259	0.0828928	0.0724253	0.0570888		IDWbar	0.185075	0.038827	0.0145911	0.0168943
IDWbar	10.0621		Si	1.32031	1.26469	1.24564	1.23892		Si	0.174879	-0.00282909	-0.0428247	0.0571405		Si	0.179465	-0.00617858	-0.0808734	0.0944971
Si	0.131249		SHBa	1.36786	1.31026	1.29011	1.28227		SHBa	0.181177	0.00461422	0.0372567	0.0166331		SHBa	0.184766	-0.0431134	0.0356939	-0.0180006
SHBa	5.29604		SwHBa	1.04157	0.997932	1.00042	0.994321		SwHBa	0.137959	-0.0103055	0.142116	-0.0109864		SwHBa	0.142821	-0.116299	0.18964	-0.136535
SwHBa	2.1161		Hmin	1.25743	1.2919	1.28162	1.28331		Hmin	0.16655	0.215473	0.121545	0.187159		Hmin	0.137309	0.190856	-0.0652645	0.0230137
Hmin	18.5552		Gmin	0.331775	0.326433	0.383637	0.389318		Gmin	0.0439447	-0.0344002	0.155384	-0.0942193		Gmin	0.0502869	-0.141405	0.262014	-0.246378
Gmin	1.5112		SHCsats	1.32948	1.2746	1.25532	1.24852		SHCsats	0.176093	0.0248451	-0.0420155	0.0568886		SHCsats	0.176445	0.0299162	-0.0955757	0.102953
SHCsats	1.89214		SsssCH	0.489429	0.491541	0.543094	0.541622		SsssCH	0.0648265	0.0681398	-0.183	0.0537109		SsssCH	0.055868	0.185258	-0.295547	0.131953
SsssCH	0.0980911		SaasC	0.836976	0.802471	0.820288	0.815578		SaasC	0.11086	-0.01612	0.164783	-0.0275557		SaasC	0.115974	-0.132822	0.229741	-0.175424
SaasC	5.69227		minSHaaCH	1.35304	1.29633	1.27543	1.26768		minSHaaCH	0.179214	-0.0130723	0.00267061	0.0158235		minSHaaCH	0.185481	-0.0464936	0.00285913	-0.00352295
minSHaaCH	31.3392		minSsCH3	0.502183	0.647294	0.713846	0.820538		minSsCH3	-0.0665158	0.199742	0.238804	0.493596		minSsCH3	-0.0988642	0.13874	-0.0636425	0.236131
minSsCH3	18.5052		minSssCH2	0.254197	0.743086	0.877843	0.912874		minSssCH2	-0.0336692	0.323759	0.359822	0.321641		minSssCH2	-0.0843427	0.229061	0.103756	-0.0387589
minSssCH2	8.67976		minSsssCH	0.489429	0.491541	0.543094	0.541622		minSsssCH	0.0648265	0.0681398	-0.183	0.0537109		minSsssCH	0.055868	0.185258	-0.295547	0.131953
minSsssCH	0.0980911		minSaasC	0.441663	0.423054	0.52696	0.523784		minSaasC	0.0584996	-0.000406467	0.239317	-0.00929333		minSaasC	0.0599505	-0.146564	0.305003	-0.18782
minSaasC	32.2218		maxSHCsats	0.921751	0.891489	0.888878	0.887284		maxSHCsats	0.122089	-0.0568879	-0.106741	0.0990191		maxSHCsats	0.13375	-0.0332313	-0.151173	0.2278
maxSHCsats	2.58588		maxSsCH3	1.04372	1.00741	0.991537	0.989116		maxSsCH3	0.138244	-0.0571942	-0.0201671	-0.101853		maxSsCH3	0.150336	-0.0856913	0.0587814	-0.199998
maxSsCH3	1.88526		maxSssCH2	1.32736	1.31319	1.29292	1.28517		maxSssCH2	-0.175813	-0.151506	-0.0358369	-0.0262342		maxSssCH2	-0.156646	-0.153564	0.0550221	0.0156883
maxSssCH2	-4.79108		maxSaaCH	1.13546	1.08783	1.08269	1.07606		maxSaaCH	0.150396	-0.00995906	0.120985	-0.00601349		maxSaaCH	0.155499	-0.105657	0.160439	-0.114647
maxSaaCH	10.0345		maxSsOH	1.36803	1.31043	1.29029	1.28246		maxSsOH	0.181201	0.00475358	0.0374882	0.0172397		maxSsOH	0.184768	-0.0430646	0.0355988	-0.0179135
maxSsOH	5.30386		Cumulative Variable Importance						half_life	0.16913	0.0987166	0.0690763	0.053084		half_life	1	1	1	1

## Sheet: Sheet3_Gabriel 2008
Data From
Gabriel, F.L.P., Routledge, E.J., Heidlberger, A., Rentsch, D., Guenther, K., Giger, W., Sumpter, J.P. and Kohler, H.P.E. (2008) Isomer-specific degradation and endocrine disrupting activity of nonylphenols. Environmental Science & Technology 42(17), 6399-6408.

## Sheet: Sheet4_other 4-quant_NP
NP isomers	Predicted half life (d)	steric	nclass	nX2	nXp3	nXp4	nXp5	nXp6	nXp7	nXp8	nXp9	nXp10	X1	X2	Xp3	Xp4	Xp5	Xp6	Xp7	Xp8	Xp9	Xp10	nXpc4	Xc3	Xc4	Xpc4	knotp	knotpv	sumdelI	tets1	htets1	htets2	diam	muldiam	rad	mulrad	W	Tg3	IDC	IDWbar	Si	SHBa	SwHBa	Hmin	Gmin	SHCsats	SsssCH	SaasC	minSHaaCH
NP91	7.20922	1.50974	12	24	29	28	29	26	22	12	6	2	7.30968	7.31237	5.65577	3.48152	2.25185	1.36112	0.707279	0.225592	0.091963	0.020833	34	2.21747	0.321114	5.30353	-1.284	-1.25309	6.45377	41.1391	41.7709	11.2882	9	2	5	2	424	4	336.805	6.71069	75.7289	9.32857	9.25846	0.382319	0.121736	3.3801	0	1.6357	1.2215
NP94	7.32695	1.46691	12	24	25	28	29	26	18	16	10	2	7.26678	7.63992	5.0123	3.54429	2.28637	1.4575	0.557871	0.343443	0.150888	0.020833	22	2.6906	0.454124	3.64994	-1.51185	-1.44837	6.40978	43.2581	41.5537	11.2539	9	2	5	2	440	2	345.109	6.70111	74.5392	9.30114	9.24529	0.391319	0.159931	3.3858	0	1.6399	1.2166
NP96	6.9663	1.45166	11	24	23	24	31	26	18	12	14	6	7.20613	8.00604	4.64037	2.94285	2.68431	1.48191	0.626024	0.237796	0.234222	0.0625	19	3.04415	0.557678	3.27738	-1.23796	-1.1858	6.28179	44.0924	40.9657	11.0779	9	4	5	2	460	0	355.088	6.68597	73.6216	9.28156	9.23901	0.410763	0.181528	3.3683	0	1.6434	1.2136
NP137	11.4045	1.50974	12	21	27	29	31	28	22	12	6	2	7.681	6.12983	5.31835	3.78632	2.67276	1.66899	0.882392	0.319036	0.130055	0.029463	22	1.0428	0.102062	2.79096	-0.77046	-0.648657	5.90118	50.0804	40.0403	10.5028	9	2	5	2	438	0	340.294	6.71534	74.2814	9.34388	9.51638	0.374482	0.309236	3.9098	0	1.7399	1.2215
NP165	3.71668	1.51736	11	25	31	28	28	26	22	14	4	0	7.19239	7.55487	6.14054	3.25188	2.0446	1.34274	0.671209	0.271656	0.048113	0	40	2.37639	0.288675	6.44281	-1.26371	-1.22276	6.65035	38.5939	42.3193	11.5044	8	3	4	1	411	8	327.554	6.71943	76.5887	9.33439	9.21371	0.431158	0.09213	3.4429	0.6077	1.6166	1.223
NP166	4.55691	1.49595	11	25	28	29	28	26	20	16	6	0	7.15372	7.86588	5.48312	3.47368	2.05333	1.37764	0.605516	0.318568	0.072169	0	31	2.85406	0.455342	4.90111	-1.48404	-1.41787	6.59588	40.2144	42.4009	11.5706	8	4	4	1	420	5	332.674	6.7136	75.8932	9.32087	9.21235	0.44088	0.117014	3.4824	0.5598	1.621	1.2205
NP168	9.5652	1.53877	13	24	31	30	29	26	24	12	2	0	7.37034	6.96525	6.08131	3.62087	2.25227	1.32347	0.829145	0.272314	0.029463	0	37	2.01742	0.278839	5.28252	-1.18782	-1.12216	6.58833	42.6499	42.551	11.5435	8	2	4	1	408	5	323.332	6.72849	76.5007	9.3551	9.34014	0.414491	0.162153	3.4344	0	1.6631	1.2254
NP169	11.579	1.51736	13	23	29	30	30	26	22	14	4	0	7.41374	6.84886	5.75049	3.66347	2.37585	1.36205	0.761773	0.324494	0.055556	0	29	1.62578	0.117851	4.14408	-1.13562	-1.04001	6.49844	45.205	40.4754	10.727	8	3	4	1	419	4	329.637	6.72337	75.6294	9.34289	9.35699	0.424213	0.196296	4.0263	1.2924	1.6744	1.223
NP170	10.7238	1.49595	12	24	25	30	31	26	20	16	6	0	7.26678	7.70181	4.7433	3.72653	2.53679	1.41985	0.679738	0.390165	0.088388	0	22	2.79626	0.497891	3.17033	-1.49146	-1.393	6.45545	44.3754	41.99	11.3816	8	4	4	1	428	1	334.668	6.71615	74.9707	9.32767	9.32698	0.433936	0.200347	3.4265	0	1.6673	1.2205
NP173	9.46868	1.51736	11	24	31	29	28	26	22	14	4	0	7.37034	6.94625	6.15271	3.6358	2.07402	1.3666	0.669628	0.301777	0.058926	0	37	1.98892	0.269338	5.42714	-1.18183	-1.12993	6.53653	41.7807	42.338	11.4799	8	3	4	1	413	4	327.811	6.72141	76.2996	9.3396	9.28653	0.416936	0.129167	3.4144	0	1.6442	1.223
NP174	11.3094	1.49595	12	23	28	31	28	26	20	16	6	0	7.39108	7.03692	5.26828	4.16347	2.10269	1.4172	0.604925	0.367631	0.089576	0	27	1.79488	0.166667	3.72264	-1.4382	-1.36035	6.43328	44.4476	39.8005	10.5436	8	4	4	1	424	0	332.925	6.71784	75.3203	9.32738	9.30338	0.412436	0.16331	4.012	1.3387	1.6556	1.2205
NP178	14.1228	1.53877	12	22	30	32	30	26	24	12	2	0	7.60172	6.20636	5.73922	4.16816	2.50026	1.33445	0.916794	0.316138	0.034021	0	29	1.16151	0.083333	3.50976	-0.938987	-0.819389	6.35246	48.2445	41.0445	10.8739	8	2	4	1	414	1	324.159	6.73218	75.7253	9.36361	9.48343	0.407547	0.266319	4.022	0.6732	1.721	1.2254
NP179	14.7586	1.51736	11	22	27	31	32	26	22	14	4	0	7.53684	6.62425	5.1049	3.9682	2.81056	1.393	0.831382	0.38418	0.068041	0	23	1.45105	0.102062	2.93469	-1.03498	-0.908158	6.27218	48.6351	40.5113	10.6705	8	3	4	1	425	0	330.751	6.72556	74.9109	9.34969	9.47162	0.417269	0.27963	3.9701	0.7025	1.7207	1.223
NP180	13.1428	1.51736	12	22	29	31	30	26	22	14	4	0	7.57906	6.32959	5.62851	4.05153	2.4628	1.3896	0.759946	0.359275	0.068041	0	27	1.27012	0.117851	3.4687	-1.03269	-0.929141	6.29841	47.4552	40.3811	10.6787	8	3	4	1	421	1	329.637	6.72543	75.3387	9.3481	9.42981	0.409991	0.233333	3.9979	0.7102	1.7021	1.223
NP185	12.0781	1.53877	13	23	30	31	30	26	24	12	2	0	7.42377	6.78682	5.81373	3.76472	2.39956	1.33762	0.856553	0.294512	0.034021	0	32	1.52204	0.096225	4.38924	-1.16967	-1.08853	6.5464	44.8657	41.0367	10.9021	8	2	4	1	412	4	324.222	6.73024	76.0235	9.3568	9.3688	0.407547	0.182986	4.0504	1.226	1.6747	1.2254
NP186	13.2185	1.51736	12	23	27	30	32	26	22	14	4	0	7.3589	7.21528	5.11549	3.67297	2.65688	1.39616	0.771141	0.362554	0.068041	0	26	1.8227	0.117851	3.77777	-1.27621	-1.18792	6.48982	45.4002	40.5026	10.6984	8	3	4	1	423	2	330.751	6.72346	75.2068	9.34289	9.35699	0.417269	0.196296	3.9985	1.2784	1.6744	1.223
NP198	10.4862	1.53877	12	24	29	30	31	26	24	12	2	0	7.30968	7.37426	5.39958	3.60805	2.54455	1.35563	0.836294	0.308926	0.041667	0	34	2.31031	0.352062	4.89246	-1.31012	-1.25344	6.49944	42.5744	42.2179	11.4195	8	2	4	1	412	3	324.843	6.72816	76.0967	9.3551	9.34014	0.400602	0.162153	3.4208	0	1.6631	1.2254
NP201	14.1338	1.53877	13	22	29	32	31	26	24	12	2	0	7.56371	6.44821	5.35244	4.13835	2.70352	1.35461	0.921273	0.339076	0.041667	0	28	1.24606	0.083333	3.46626	-1.03201	-0.917911	6.30505	48.2553	41.0641	10.8612	8	2	4	1	416	0	324.843	6.73208	75.5118	9.36361	9.48343	0.400602	0.266319	4.0081	0.6268	1.721	1.2254
NP202	14.8679	1.51736	11	21	27	31	32	27	22	14	4	0	7.681	6.17272	5.08179	4.04371	2.87837	1.55175	0.829145	0.426777	0.083333	0	22	1.0428	0.102062	2.65463	-0.906788	-0.773657	5.93901	50.3804	40.4566	10.6201	8	3	4	1	429	0	331.785	6.72629	74.5644	9.3549	9.54444	0.399128	0.316667	3.9338	0	1.7484	1.223
NP208	14.5267	1.56019	10	24	31	33	28	26	26	10	0	0	7.37034	7.07004	5.55281	4.31305	2.18052	1.28033	0.988663	0.242851	0	0	37	2.15647	0.322169	4.60531	-1.37082	-1.29336	6.58791	43.6373	42.8373	11.6349	7	6	4	3	401	0	315.173	6.73721	76.7769	9.37061	9.39376	0.446281	0.195139	3.4641	0	1.682	1.2278
NP209	8.40441	1.56019	11	25	31	32	28	26	26	10	0	0	7.19239	7.64419	5.67931	3.80956	2.13279	1.28349	0.928422	0.221225	0	0	40	2.51036	0.333333	5.5903	-1.51814	-1.47967	6.71185	39.574	42.8305	11.6634	7	6	4	3	399	5	315.173	6.73546	77.0775	9.36381	9.27914	0.460503	0.111806	3.4926	0.5528	1.6357	1.2278
NP211	16.4368	1.56019	10	23	31	34	28	26	26	10	0	0	7.44643	6.73212	5.53814	4.51218	2.20131	1.28247	1.0134	0.251376	0	0	34	1.46014	0.068041	4.1067	-1.26951	-1.17308	6.58934	45.9025	41.6828	11.108	7	6	4	3	403	0	315.055	6.73898	76.4877	9.37231	9.42242	0.446281	0.215972	4.0843	1.1982	1.6936	1.2278
NP92	7.13139	1.48832	12	24	29	28	29	26	22	12	6	2	7.30968	7.31237	5.65577	3.48152	2.25185	1.36112	0.707279	0.225592	0.091963	0.020833	34	2.21747	0.321114	5.30353	-1.284	-1.25309	6.45377	41.1391	41.7709	11.2882	9	2	5	2	424	4	336.805	6.71069	75.7289	9.32857	9.25846	0.382319	0.121736	3.3801	0	1.6357	1.2215
NP93	8.54899	1.4807	13	23	28	28	29	26	20	14	8	2	7.39108	6.95237	5.73913	3.46274	2.24872	1.39557	0.636765	0.277075	0.114481	0.019642	27	1.74606	0.166667	4.14849	-1.17902	-1.11803	6.41128	43.9445	39.4606	10.4375	9	2	5	2	433	4	341.328	6.70727	75.0419	9.31636	9.27531	0.386819	0.15588	3.986	1.3387	1.6471	1.219
NP95	7.29924	1.45929	12	24	25	28	29	26	18	16	10	2	7.26678	7.63992	5.0123	3.54429	2.28637	1.4575	0.557871	0.343443	0.150888	0.020833	22	2.6906	0.454124	3.64994	-1.51185	-1.44837	6.40978	43.2581	41.5537	11.2539	9	2	5	2	440	2	345.109	6.70111	74.5392	9.30114	9.24529	0.391319	0.159931	3.3858	0	1.6399	1.2166
[truncated: 9 more columns]
